# Supplementary material for: Heterogeneous crystalline–amorphous interface for boosted electrocatalytic nitrogen reduction to ammonia
Source: Royal Society of Chemistry journal article supplement (doi:10.1039/d2ta07781g), 2022-12-01
Supplement: d2ta07781g1.pdf [file d2ta07781g1.pdf]

## Supporting Information

# **Heterogeneous crystalline-amorphous interface for boosted electrocatalytic nitrogen reduction to ammonia**

*Yuchi Wan,<sup>‡a</sup> Zhijie Wang,<sup>‡b</sup> Muyun Zheng,<sup>a</sup> Jia Li<sup>\*bd</sup> and Ruitao Lv<sup>\*ac</sup>*

<sup>a</sup> State Key Laboratory of New Ceramics and Fine Processing, School of Materials Science and Engineering, Tsinghua University, Beijing, 100084, China

<sup>b</sup> Shenzhen Geim Graphene Center and Institute of Materials Research, Tsinghua Shenzhen International Graduate School, Tsinghua University, Shenzhen 518055, China

<sup>c</sup> Key Laboratory of Advanced Materials (MOE), School of Materials Science and Engineering, Tsinghua University, Beijing, 100084, China

<sup>d</sup> Guangdong Provincial Key Laboratory of Thermal Management Engineering and Materials, Tsinghua Shenzhen International Graduate School, Tsinghua University, Shenzhen 518055, China

\* Corresponding authors.

*E-mail address:* [lvruitao@tsinghua.edu.cn](mailto:lvruitao@tsinghua.edu.cn) (Ruitao Lv), [li.jia@sz.tsinghua.edu.cn](mailto:li.jia@sz.tsinghua.edu.cn) (Jia Li).

<sup>‡</sup> Yuchi Wan and Zhijie Wang contributed equally to this work.

## Experimental Procedures

**Chemicals:** Bismuth chloride (Macklin,  $\text{BiCl}_3$ , AR), ammonium heptamolybdate tetrahydrate (Aladdin,  $(\text{NH}_4)_6\text{Mo}_7\text{O}_{24}\cdot 4\text{H}_2\text{O}$ , 99.9%), sodium borohydride (Aladdin,  $\text{NaBH}_4$ , 98%), sodium sulfate (Sinopharm Chemical Reagent Co., Ltd,  $\text{Na}_2\text{SO}_4$ , AR), ethanol absolute (Sinopharm Chemical Reagent Co., Ltd,  $\text{C}_2\text{H}_6\text{O}$ , AR), acetone (Beijing Chemical Works,  $\text{C}_3\text{H}_6\text{O}$ , AR), isopropanol (Sinopharm Chemical Reagent Co., Ltd,  $\text{C}_3\text{H}_8\text{O}$ , AR), ammonium chloride (Sinopharm Chemical Reagent Co., Ltd,  $\text{NH}_4\text{Cl}$ , AR), sodium hypochlorite aqueous solution (Sinopharm Chemical Reagent Co., Ltd,  $\text{NaClO}$ , CP), sodium hydroxide (Beijing Chemical Works,  $\text{NaOH}$ , AR), sodium citrate (Sinopharm Chemical Reagent Co., Ltd,  $\text{C}_6\text{H}_5\text{Na}_3\text{O}_7$ , 98%), salicylic acid (Sinopharm Chemical Reagent Co., Ltd,  $\text{C}_7\text{H}_6\text{O}_3$ , AR), sodium nitroprusside dihydrate (Sinopharm Chemical Reagent Co., Ltd,  $\text{Na}_2[\text{Fe}(\text{CN})_5\text{NO}]\cdot 2\text{H}_2\text{O}$ , AR), hydrazine hydrate (Sinopharm Chemical Reagent Co., Ltd,  $\text{N}_2\text{H}_4\cdot\text{H}_2\text{O}$ , 85%), sulfuric acid (Beijing Chemical Works,  $\text{H}_2\text{SO}_4$ , AR), hydrochloric acid (Beijing Chemical Works,  $\text{HCl}$ , AR), p-Dimethylaminobenzaldehyde (Energy Chemical,  $\text{C}_9\text{H}_{11}\text{NO}$ , 98%). Ultrapure water used throughout all experiments was purified through a Millipore system. Ultra-high purity  $\text{N}_2$  (99.999%) and Ar (99.999%) were purchased from PRAXAIR.

**Sample characterizations:** X-ray diffraction (XRD) patterns were collected by a Rigaku D/max-2500 using  $\text{Cu K}\alpha$  radiation ( $\lambda=1.5406 \text{ \AA}$ , 40 kV, and 150 mA). Scanning electron microscopy (SEM) images were obtained by a field emission scanning electron microscope (GeminiSEM 500), which was equipped with an energy dispersive spectroscopy (EDS,

Extreme) detector. Information on the microstructures and fringes was obtained via transmission electron microscope (TEM) (JEOL JEM-2100F) with a field emission gun operating at 200 kV, and elemental-mapping information was obtained by the corresponding EDS. X-ray photoelectron spectroscopy (XPS) was collected by scanning X-ray microprobe (ESCALAB 250Xi, Thermo Fisher Scientific.) to analyze the chemical states of the elements, and the binding energies of all elements were calibrated by using the C1s peak of adventitious carbon at 284.80 eV. Raman data were collected on a HORIBA LabRAM HR Evolution spectroscopy using the excitation wavelength of 532 nm. Nitrogen adsorption-desorption tests were carried out on the Belshop-mini II surface and the porosity analyzer, and specific surface areas were calculated through the Brunauer-Emmert-Teller (BET) method. Pore volumes and sizes were calculated from the pore-size distribution curves by the density functional theory (DFT) law. The absorbance data of the spectrophotometer were collected on the SHIMADZU UV-2450 ultraviolet-visible (UV-vis) spectrophotometer. Temperature-programmed desorption of N<sub>2</sub> (N<sub>2</sub>-TPD) experiment was conducted on a Quantachrome Chem BET Pulsar TPR/TPD. 20 mg catalyst was first pretreated at 150 °C for 1 h in pure He with a flow rate of 50 mL/min and then cooled down to room temperature in He. The catalyst adsorbed N<sub>2</sub> for 1 h, and the remaining N<sub>2</sub> was purged by He for half an hour with a flow rate of 50 mL/min. Finally, the desorption of N<sub>2</sub> was carried out by heating from room temperature to 800 °C at a rate of 10 °C/min to record the N<sub>2</sub>-TPD profile. X-ray absorption spectroscopy (XAS) analysis was performed with Si (111) crystal monochromators at the BL14W1 beamlines at the

Shanghai Synchrotron Radiation Facility (SSRF) (Shanghai, China). The XAS spectra were recorded at room temperature using a 4-channel Silicon Drift Detector (SDD) Bruker 5040. Negligible changes in the line-shape and peak position of Bi L<sub>3</sub>-edge XANES spectra were observed between two scans taken for a specific sample. The XAS spectra of these standard samples (Bi foil and Bi<sub>2</sub>O<sub>3</sub>) were recorded in transmission mode. The spectra were processed and analyzed by the software codes Athena and Artemis.

***Working electrode preparation and electrochemical tests in H-cell:*** Prior to the working electrode preparation, the 1.0×1.5 cm<sup>2</sup> carbon cloth (CeTech Taiwan, NOS10025) was washed with acetone, ethanol, and deionized water to clean the surface impurities, followed by the surface treatment in air plasma environment to increase the hydrophilia of carbon cloth. For the working electrode preparation, 1 mg catalyst was dispersed in the mixture of 470 μL isopropanol and 30 μL Nafion solution (5wt%). The mixture was sonicated for 1 h to form a uniform catalyst ink. 50 μL of the resulting catalyst ink was drop-casted onto a carbon cloth with a loading area of 1×1 cm<sup>2</sup>, and the final mass loading was calculated to be 0.1 mg cm<sup>-2</sup>.

All electrochemical N<sub>2</sub> reduction reaction (NRR) experiments were carried out with an electrochemical workstation (Bio-Logic Science EC-LAB) at room temperature. An H-type cell was used in this work, in which two chambers are separated by a Nafion 115 membrane. In order to eliminate possible ammonia contamination, the Nafion 115 membrane was pretreated by sonicating in 0.05 M H<sub>2</sub>SO<sub>4</sub> for 10 minutes before any electrochemical tests. The electrochemical experiments were carried out *via* a three-electrode configuration (the working

electrode of the carbon cloth loading catalysts, the counter electrode of Pt foil, and the reference electrode of Ag/AgCl (3.5 M KCl)). 30 mL 0.10 M Na<sub>2</sub>SO<sub>4</sub> was used as electrolytes, which were purged with ultra-high purity N<sub>2</sub> (99.999%) for 30 min before N<sub>2</sub> reduction measurement, and then bubbled with a constant flow rate of 20 mL min<sup>-1</sup> throughout the whole electrolysis process. Due to the high solubility of ammonia in aqueous solution, the downstream acid trap was not implemented in this work. All potentials were referenced against the reversible hydrogen electrode (RHE) based on the Nernst equation ( $E_{\text{RHE}} = E_{\text{Ag/AgCl (3.5 M KCl)}} + 0.059 \times \text{pH} + 0.205$ ). Linear sweep voltammogram (LSV) measurements were performed from -0.2 V to -0.6 V vs. RHE at a scan rate of 5 mV s<sup>-1</sup>. For NRR experiments, potentiostatic tests were conducted at different potentials ranging from -0.2 V to -0.6 V vs. RHE for 2h. After the entire reduction reaction was terminated, the electrolyte was collected to detect the ammonia product.

***Ammonia quantification:*** The concentration of synthesized ammonia via the electrocatalytic NRR was determined by the indophenol blue method. In the indophenol blue method, 2 mL electrolyte was removed from the electrochemical reaction vessel after the electrolysis process and added into 2 mL NaOH solution (1 M) containing 5 % salicylic acid and 5 % sodium citrate (by weight), and then followed by addition of 1 mL NaClO (0.05 M) and 0.2 mL C<sub>5</sub>FeN<sub>6</sub>Na<sub>2</sub>O aqueous solution (1wt%). After standing in darkness for 2 hours, the absorption spectrum was measured using a UV-vis spectrophotometer. The formation of indophenol blue was determined using absorbance at a wavelength of 655 nm. The concentration-absorbance curves were calibrated using standard solutions: 0.1 M Na<sub>2</sub>SO<sub>4</sub> electrolyte with a series of

concentrations of  $\text{NH}_4\text{Cl}$ . The standard curve was plotted with the absorbance values at a wavelength of 655 nm on the *y-axis* and the concentration of  $\text{NH}_3$  on the *x-axis*. The obtained standard curve ( $y = 0.013 + 0.342x$ ,  $R^2=0.999$ ) shows a good linear relation of absorbance value with  $\text{NH}_3$  concentration.

***<sup>15</sup>N isotopic labeling measurement:*** The  $^{15}\text{N}_2$  isotopic labeling experiment was carried out using  $^{15}\text{N}_2$  as the feeding gas (WUHAN NEWRADAR SPECIAL GAS Co., LTD., 99 atom%  $^{15}\text{N}$ ) with 0.1 M  $\text{Na}_2\text{SO}_4$  electrolyte. Before electrolysis, ultra-high purity Ar (99.999%) was purged for 30 min to remove  $^{14}\text{N}_2$ . Then  $^{15}\text{N}_2$  was pre-purified by flowing through 0.05 M  $\text{H}_2\text{SO}_4$  solution to remove N contamination, and purged for 30 min to saturate the electrolyte. After  $^{15}\text{N}_2$  electroreduction for 2 h at -0.4 V vs. RHE in 0.1 M  $\text{Na}_2\text{SO}_4$  solution, the obtained  $^{15}\text{NH}_4^+$  was determined by  $^1\text{H}$  nuclear magnetic resonance ( $^1\text{H}$  NMR, Bruker 600MHz). In detail, the pH of the electrolyte was firstly adjusted to 2, and then 425  $\mu\text{L}$  of electrolyte was mixed with 50  $\mu\text{L}$  DMSO- $d_6$  and 25  $\mu\text{L}$  maleic acid (10 ppm) as an internal standard for  $^1\text{H}$  NMR measurement.

***Determination of hydrazine:*** The content of hydrazine in the electrolyte was measured by the Watt and Chrisp method. The hydrazine ( $\text{N}_2\text{H}_4$ ) color reagent was prepared by dissolving 5.99 g p-Dimethylaminobenzaldehyde in the mixture of 30 mL concentrated HCl and 300 mL ethanol. 3 mL above prepared color reagent was added into 3 mL electrolyte and then was stirred 10 min at room temperature in darkness. The absorbance of hydrazine in the resulting electrolyte was estimated at 460 nm. Absolute calibration was achieved using hydrazine

hydrate solutions of known concentration as standards, and the fitting curve shows a good linear relation of absorbance with  $\text{N}_2\text{H}_4$  concentration ( $y = 0.018 + 1.151x$ ,  $R^2=0.999$ ).

**Determination of  $\text{NO}_3^-$ :** In a typical procedure, 5.0 mL of standard or sample solutions were mixed with 0.10 mL of 1.0 M HCl. After shaking up and standing for 5 min, the concentration of  $\text{NO}_3^-$  was measured using a UV-vis spectrophotometer at a wavelength range from 200 nm to 300 nm. The absorbance of  $\text{NO}_3^-$  in the resulting electrolyte was estimated at 220 nm. Absolute calibration was achieved using  $\text{NaNO}_3$  solutions of known concentration as standards, and the fitting curve shows a good linear relation of absorbance with  $\text{NO}_3^-$  concentration ( $y = 0.005 + 0.055x$ ,  $R^2=0.999$ ).

**Determination of  $\text{NO}_2^-$ :** The  $\text{NO}_2^-$  color reagent A was prepared by dissolving 0.5 g sulfanilamide in 50.0 mL of 2.0 M HCl solution. The  $\text{NO}_2^-$  color reagent B was prepared by dissolving 20 mg N-(1-Naphthyl) ethylenediamine dihydrochloride in 20.0 mL of deionized water. Then 0.10 mL of color reagent A was added to 5.0 mL of standard or sample solutions. After mixing up and standing for 10 min, 0.10 mL of color reagent B was added to the above solution. The solution was then shaken up and standing for 30 min, and the concentration of  $\text{NO}_2^-$  was measured using a UV-vis spectrophotometer at wavelength range from 450 nm to 650 nm. The absorbance of  $\text{NO}_2^-$  in the resulting electrolyte was estimated at 540 nm. Absolute calibration was achieved using  $\text{NaNO}_2$  solutions of known concentration as standards, and the fitting curve shows a good linear relation of absorbance with  $\text{NO}_2^-$  concentration ( $y = -0.003 + 1.133x$ ,  $R^2=0.999$ ).

**Calculation of NH<sub>3</sub> yield rate and Faradaic efficiency:**

The NH<sub>3</sub> yield rate ( $R$ ) was determined using the following equation:

$$R = \frac{C \cdot V}{t \cdot S} \quad (1)$$

where  $C$  is the measured NH<sub>3</sub> concentration,  $V$  is the volume of the electrolyte,  $t$  is the reaction time, and  $S$  is the catalyst loading mass.

The Faradaic efficiency ( $\eta$ ) was determined using the following equation:

$$\eta = \frac{n \cdot F \cdot C \cdot V}{M \cdot Q} \quad (2)$$

where  $n$  is the number of electrons required for producing one NH<sub>3</sub> molecule ( $n=3$ ),  $F$  is the Faraday constant ( $F= 96485.33$ ),  $C$  is the measured NH<sub>3</sub> concentration,  $V$  is the volume of the electrolyte,  $M$  is the relative molecular mass of NH<sub>3</sub> ( $M=17$ ), and the  $Q$  is the total charge passed through the electrodes.

The NH<sub>3</sub> partial current density ( $j$ ) was determined using the following equation:

$$j = \frac{Q \cdot FE}{t \cdot m} \quad (3)$$

where  $Q$  is the total charge passed through the electrodes,  $FE$  is the Faradaic efficiency,  $t$  is the reaction time, and  $m$  is the geometrical area of the working electrode.



## Supplementary Results

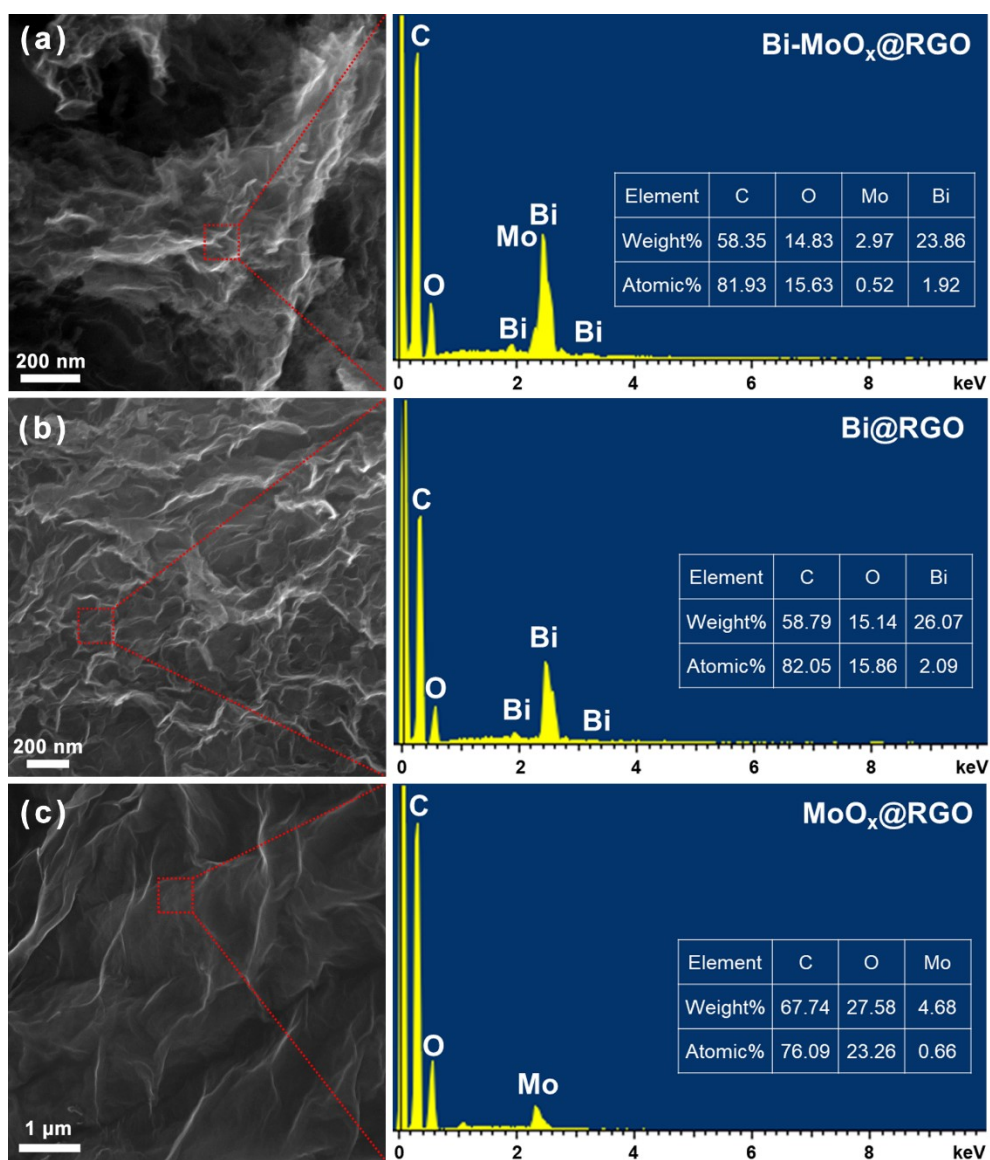

**Fig. S1.** SEM images and corresponding EDS analysis of (a) Bi-MoO<sub>x</sub>@RGO, (b) Bi@RGO, and (c) MoO<sub>x</sub>@RGO samples.

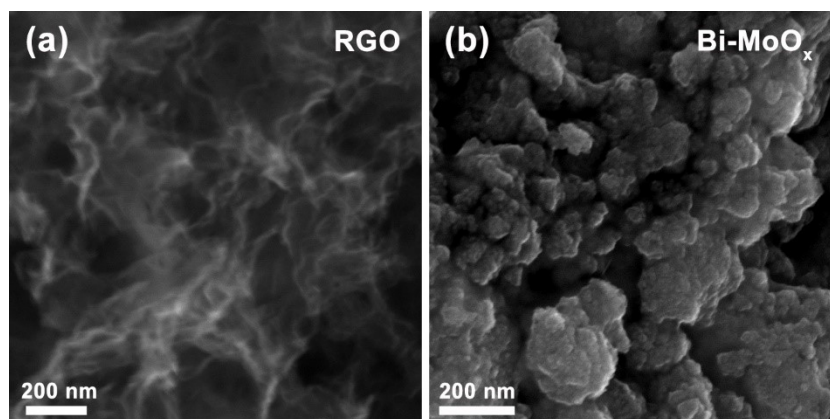

**Fig. S2.** SEM images of (a) RGO and (b) Bi-MoO<sub>x</sub> samples.

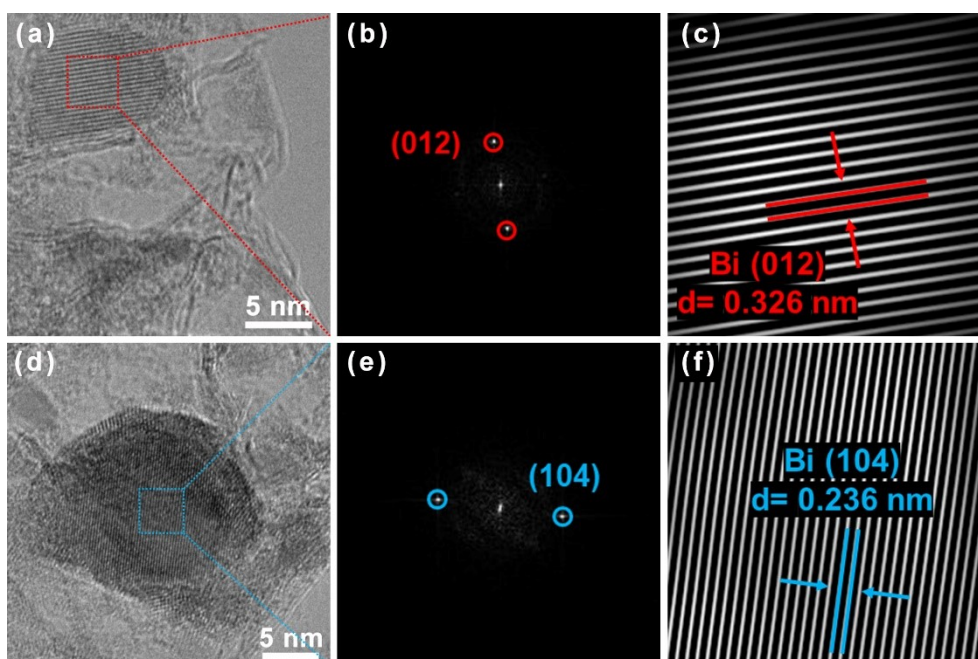

**Fig. S3.** (a, d) HRTEM images, (b, e) FFT patterns, and (c, f) corresponding IFFT patterns of the Bi@RGO sample.

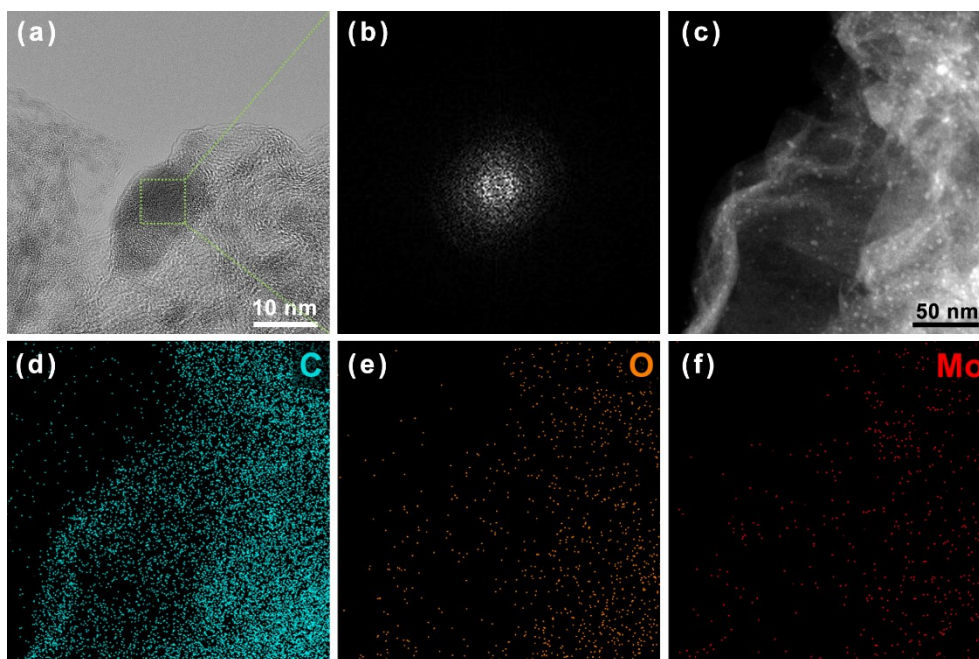

**Fig. S4.** (a) HRTEM image, (b) FFT pattern, (c) dark-field STEM image, and (d-f) corresponding elemental mapping images of  $\text{MoO}_x@\text{RGO}$  sample.

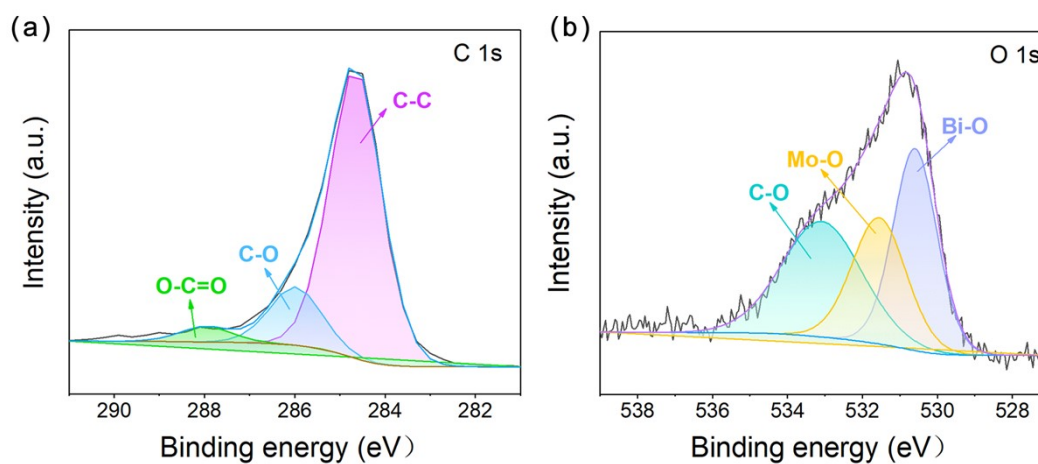

**Fig. S5.** X-ray photoelectron spectroscopy (XPS): (a) C 1s and (b) O 1s fine scan spectra of  $\text{Bi-MoO}_x@\text{RGO}$  sample.

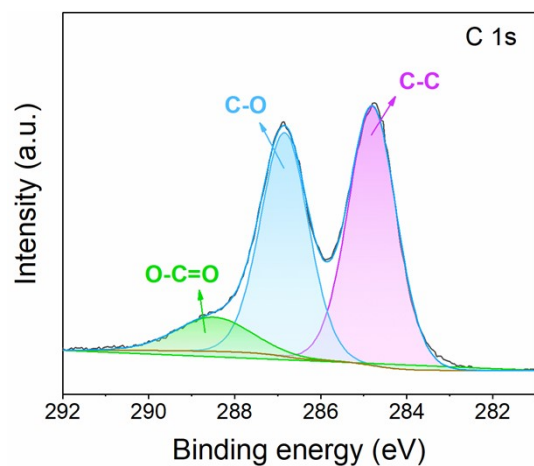

**Fig. S6.** C 1s XPS fine scan spectra of GO sample.

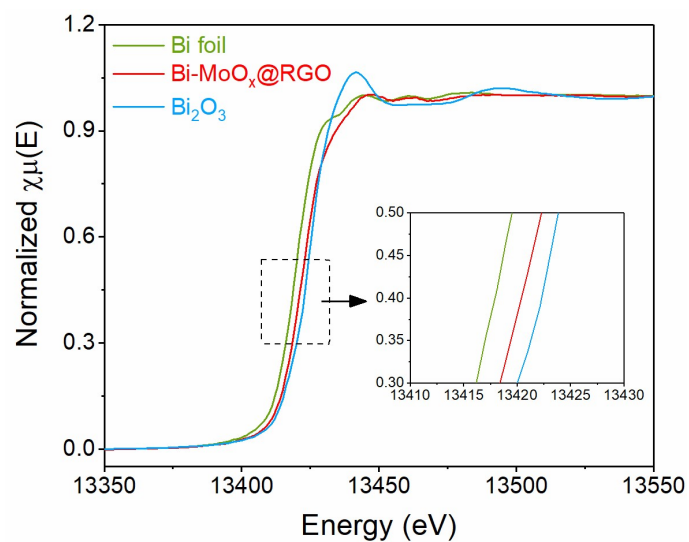

**Fig. S7.** XANES spectra of Bi L<sub>3</sub>-edge for the Bi foil, Bi-MoO<sub>x</sub>@RGO, and Bi<sub>2</sub>O<sub>3</sub>.

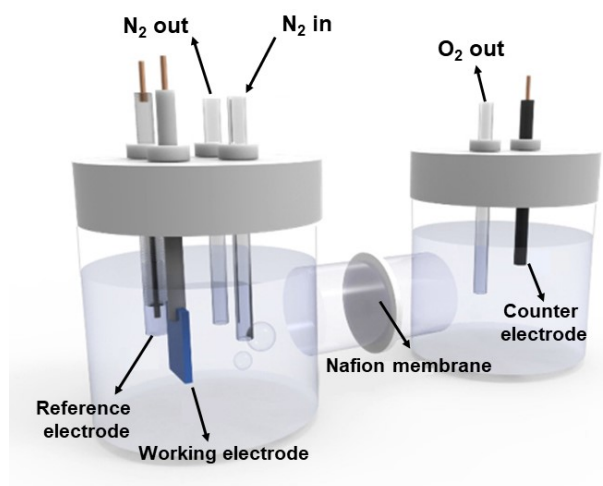

**Fig. S8.** Schematic illustration of the H-cell with a standard three-electrode system.

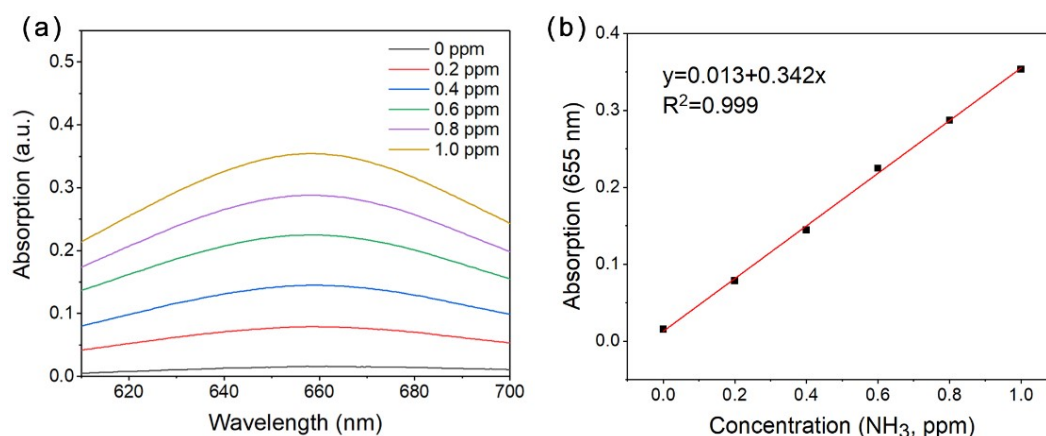

**Fig. S9.** Calibration curve of the indophenol blue method in 0.10 M Na<sub>2</sub>SO<sub>4</sub> using NH<sub>4</sub>Cl solutions with specific concentrations as standards. (a) UV-vis curves of indophenol assays with different concentrations of NH<sub>3</sub> after incubated for 2 hours and (b) calibration curve used for determining NH<sub>3</sub> concentration. The absorbance at 655 nm was measured by a UV-vis spectrophotometer, and the fitting curve shows a good linear correlation of absorbance with NH<sub>3</sub> concentration ( $y = 0.013 + 0.342x$ ,  $R^2=0.999$ ).

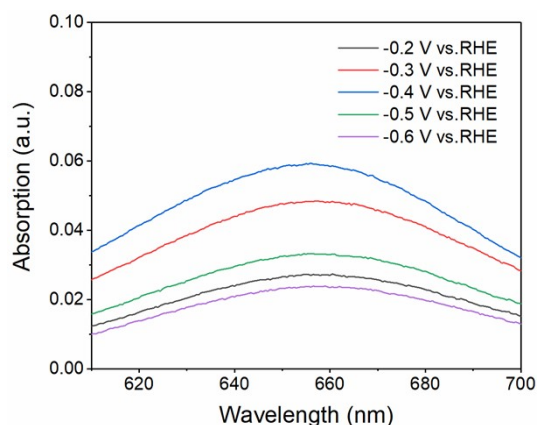

**Fig. S10.** UV-vis spectra of electrolytes in the cathodic chamber stained with the indophenol indicator after electrocatalytic NRR for 2 h on Bi-MoO<sub>x</sub>@RGO catalysts at different potentials.

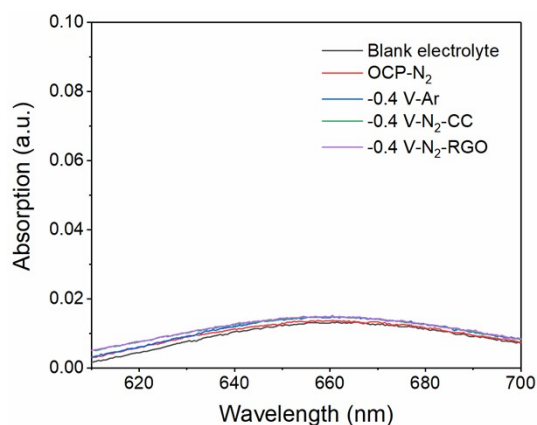

**Fig. S11.** UV-vis spectra of electrolytes stained with the indophenol indicator under different conditions. (Black line for blank electrolyte; red line for N<sub>2</sub> saturated electrolyte after electrolysis for 2 h on Bi-MoO<sub>x</sub>@RGO catalysts at open-circuit potential (OCP); blue line for Ar saturated electrolyte after electrolysis for 2 h on Bi-MoO<sub>x</sub>@RGO catalysts at -0.4 V vs. RHE; green line for N<sub>2</sub> saturated electrolyte after electrolysis 2 h on carbon cloth (CC) at -0.4 V vs. RHE.; purple line for N<sub>2</sub> saturated electrolyte after electrolysis for 2 h on RGO catalysts at -0.4 V vs. RHE)

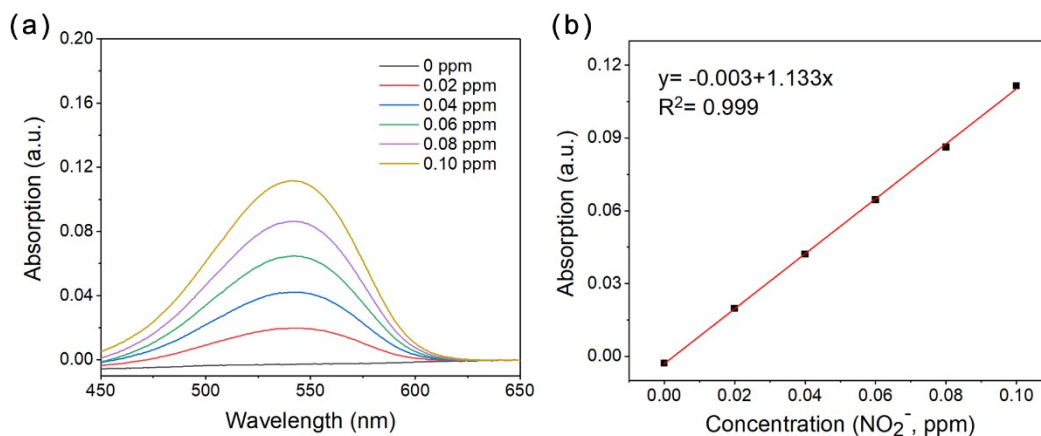

**Fig. S12.** Calibration for  $\text{NO}_2^-$  detection. (a) UV-vis curves of different concentrations of  $\text{NO}_2^-$  stained with the color indicator and (b) calibration curve used for estimation of  $\text{NO}_2^-$  concentration. The absorbance at 540 nm was measured by a UV-vis spectrophotometer, and the fitting curve shows a good linear correlation of absorbance with  $\text{NO}_2^-$  concentration ( $y = -0.003 + 1.133x$ ,  $R^2=0.999$ ).

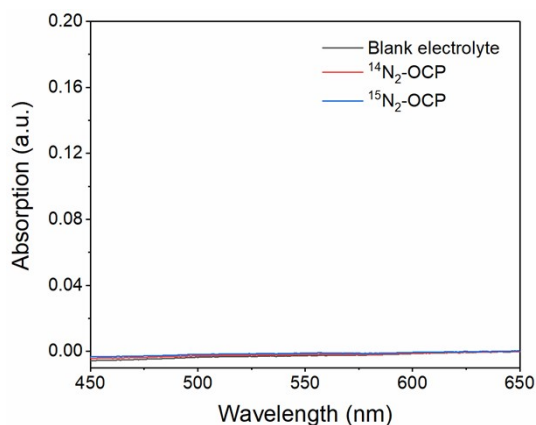

**Fig. S13.** UV-vis absorption spectra for determining the  $\text{NO}_2^-$  concentration in the blank electrolyte as well as electrolytes after being fed with  $^{15}\text{N}_2$  or  $^{14}\text{N}_2$  at open-circuit potential (OCP) for 2 h.

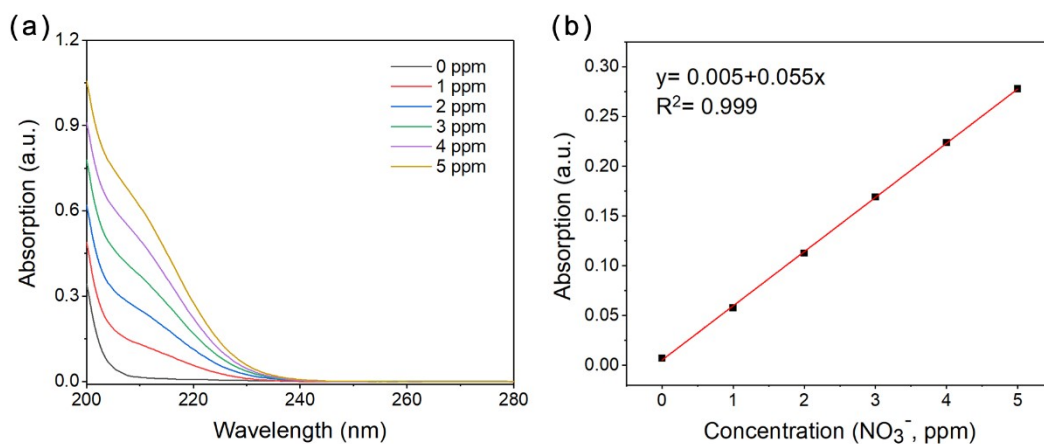

**Fig. S14.** Calibration for  $\text{NO}_3^-$  detection. (a) UV-vis curves of different concentrations of  $\text{NO}_3^-$  and (b) calibration curve used for estimation of  $\text{NO}_3^-$  concentration. The absorbance at 220 nm was measured by a UV-vis spectrophotometer, and the fitting curve shows a good linear correlation of absorbance with  $\text{NO}_3^-$  concentration ( $y = 0.005 + 0.055x$ ,  $R^2=0.999$ ).

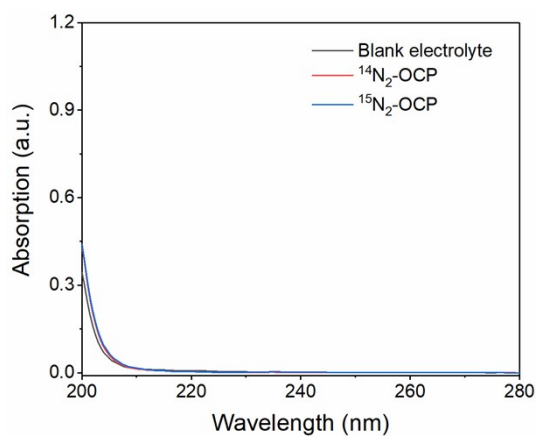

**Fig. S15.** UV-vis absorption spectra for determining the  $\text{NO}_3^-$  concentration in the blank electrolyte as well as electrolytes after being fed with  $^{15}\text{N}_2$  or  $^{14}\text{N}_2$  at open-circuit potential (OCP) for 2 h.



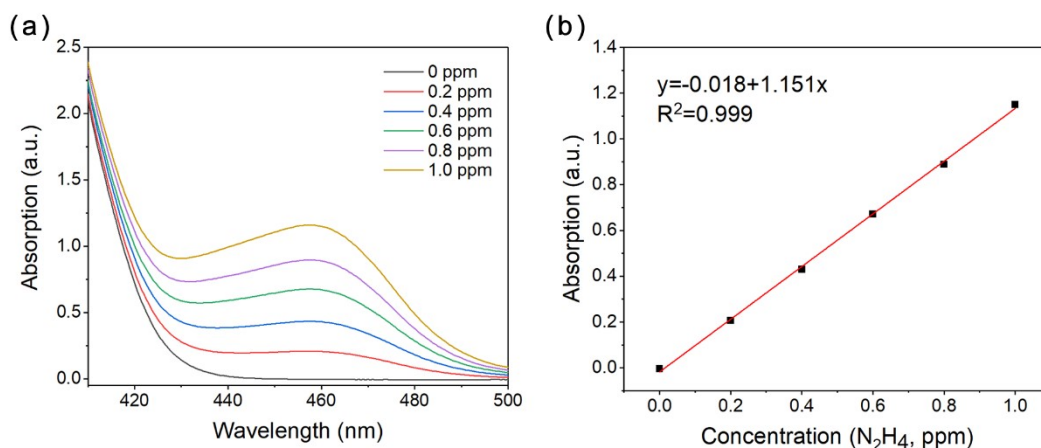

**Fig. S16.** Calibration for  $N_2H_4$  detection using the Watt and Chrisp method. (a) UV-vis curves of different concentrations of  $N_2H_4$  stained with the color indicator and incubated for 10 min and (b) calibration curve used for estimation of  $N_2H_4$  concentration. The absorbance at 460 nm was measured by a UV-vis spectrophotometer, and the fitting curve shows a good linear correlation of absorbance with  $N_2H_4$  concentration ( $y = 0.018 + 1.151x$ ,  $R^2=0.999$ ).

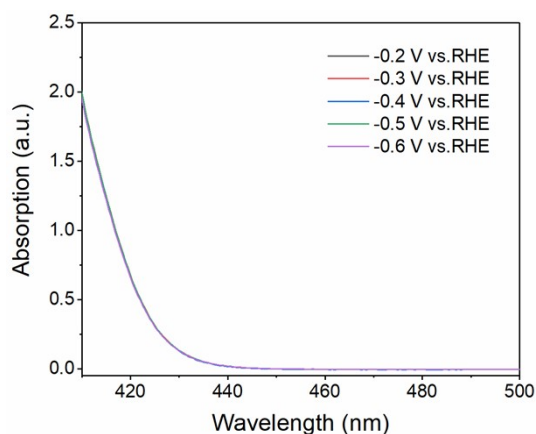

**Fig. S17.** UV-vis absorption spectra of the electrolytes stained with  $N_2H_4$  color indicator after electrocatalytic NRR on  $Bi-MoO_x@RGO$  catalyst at different potentials.

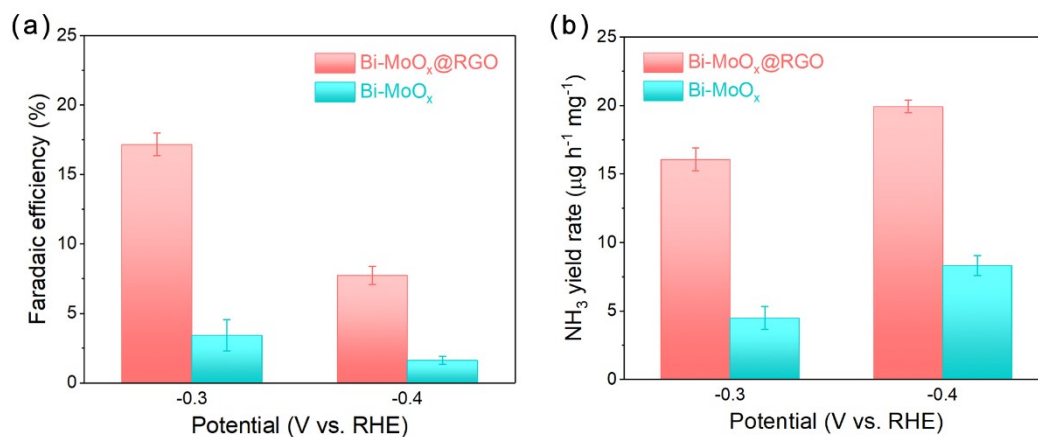

**Fig. S18.** (a) Faradaic efficiency, and (b) NH<sub>3</sub> yield rate of Bi-MoO<sub>x</sub>@RGO and Bi-MoO<sub>x</sub> samples at different potentials.

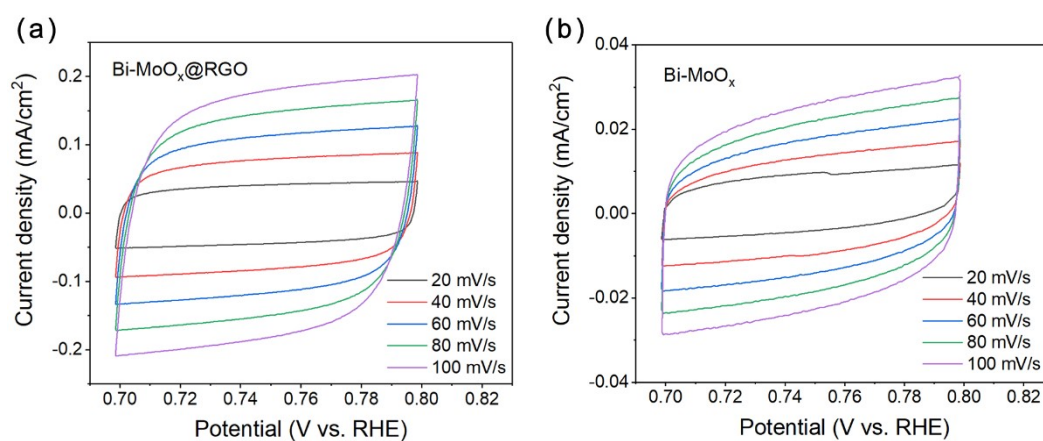

**Fig. S19.** Electrochemically active surface area (ECSA) analysis. Cyclic voltammetry (CV) curves of (a) Bi-MoO<sub>x</sub>@RGO and (b) Bi-MoO<sub>x</sub> samples.

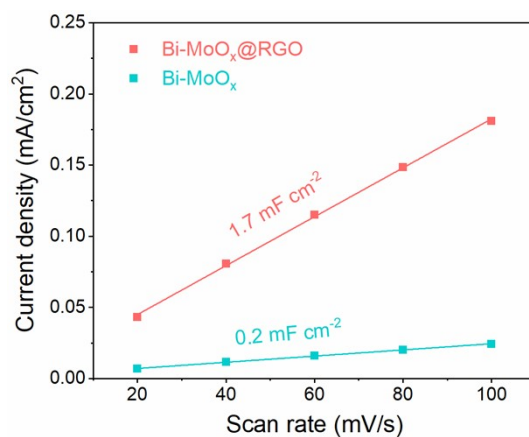

**Fig. S20.** Charging current density differences plotted against scan rates of cyclic voltammetry (CV) for Bi-MoO<sub>x</sub>@RGO and Bi-MoO<sub>x</sub> samples.

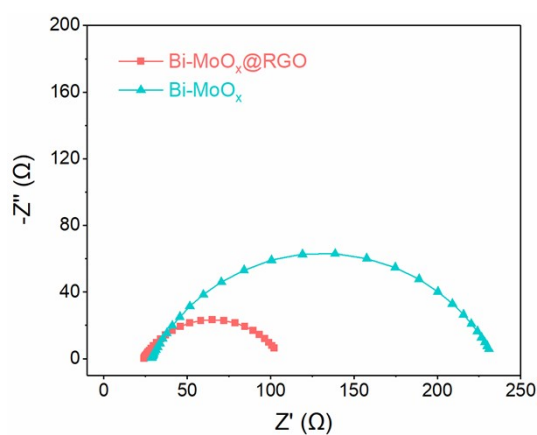

**Fig. S21.** Electrochemical impedance spectra (EIS) of Bi-MoO<sub>x</sub>@RGO and Bi-MoO<sub>x</sub> samples.

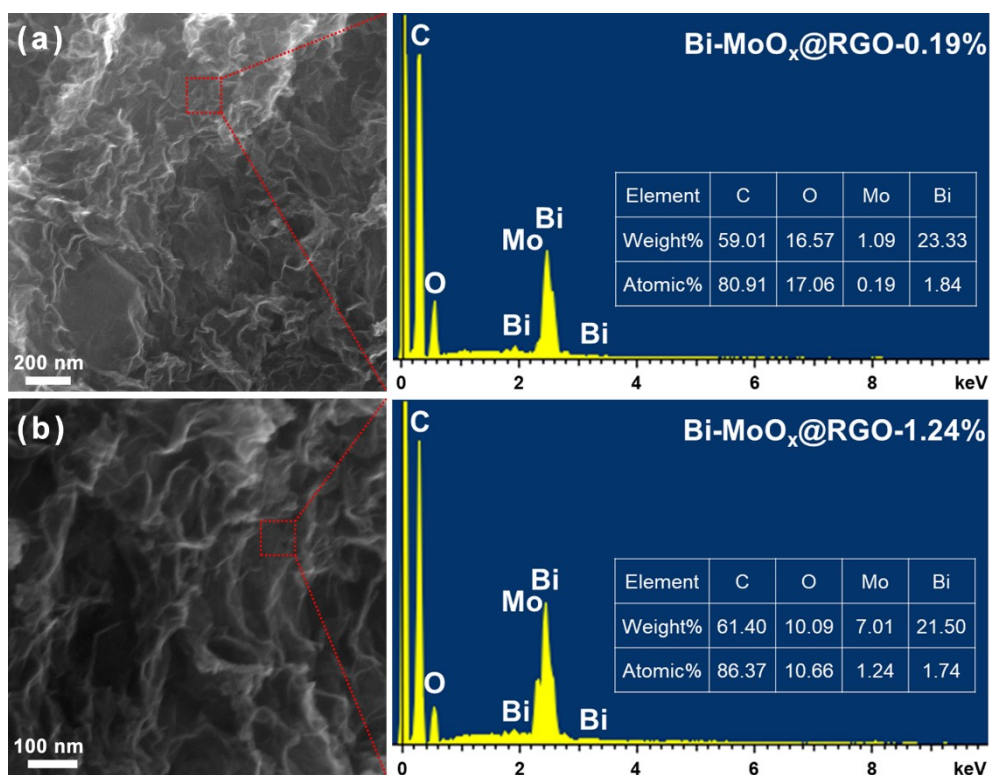

**Fig. S22.** SEM images and corresponding EDS analysis of (a) Bi-MoO<sub>x</sub>@RGO-0.19% and (b) Bi-MoO<sub>x</sub>@RGO-1.24% samples.

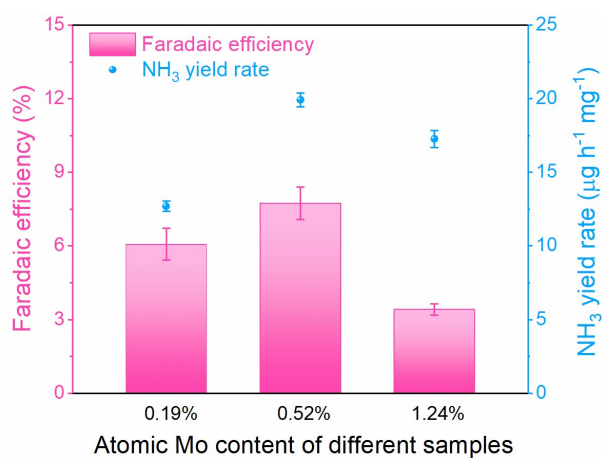

**Fig. S23.** Faradaic efficiency and NH<sub>3</sub> yield rate of different samples with different atomic Mo content.

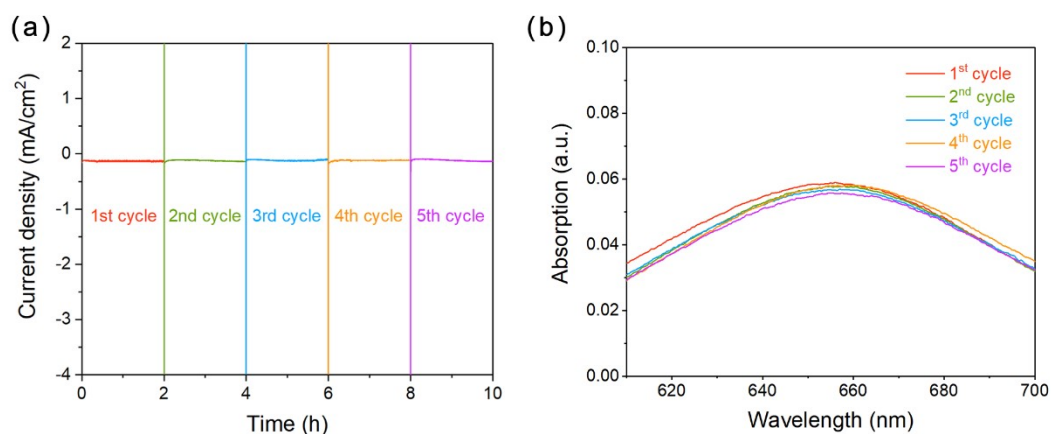

**Fig. S24.** (a) Chronoamperometry curves of the Bi-MoO<sub>x</sub>@RGO catalyst at -0.4 V vs. RHE for five consecutive cycling tests. (b) UV-vis spectra of the electrolyte stained with indophenol indicator after each cycling test.

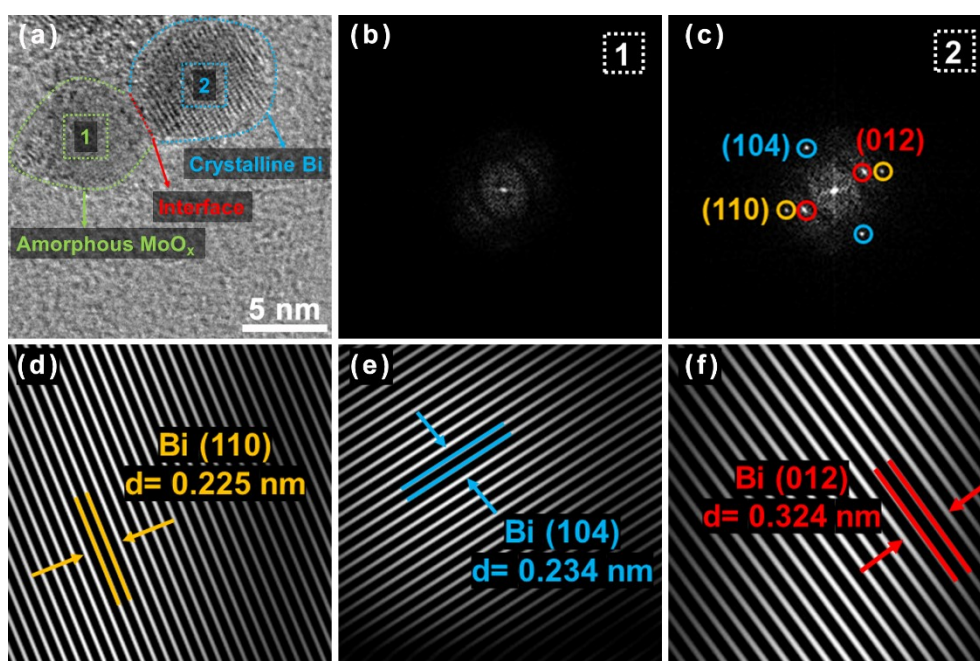

**Fig. S25.** (a) HRTEM image of the Bi-MoO<sub>x</sub>@RGO catalyst after cycling tests. (b) FFT pattern measured at the region 1 in (a). (c) FFT pattern measured at the region 2 in (a). (d-f) Corresponding IFFT patterns of (c).

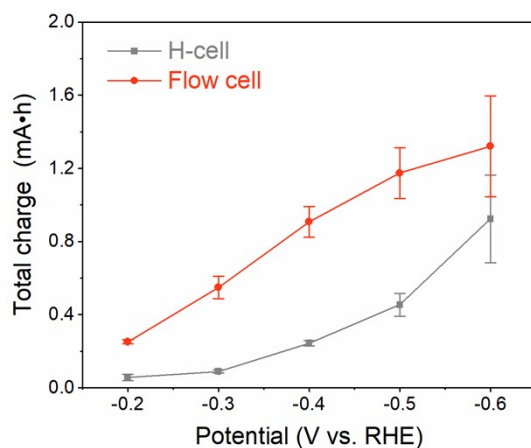

**Fig. S26.** Comparison of total charge passed through the electrode in the flow cell and the H-cell.

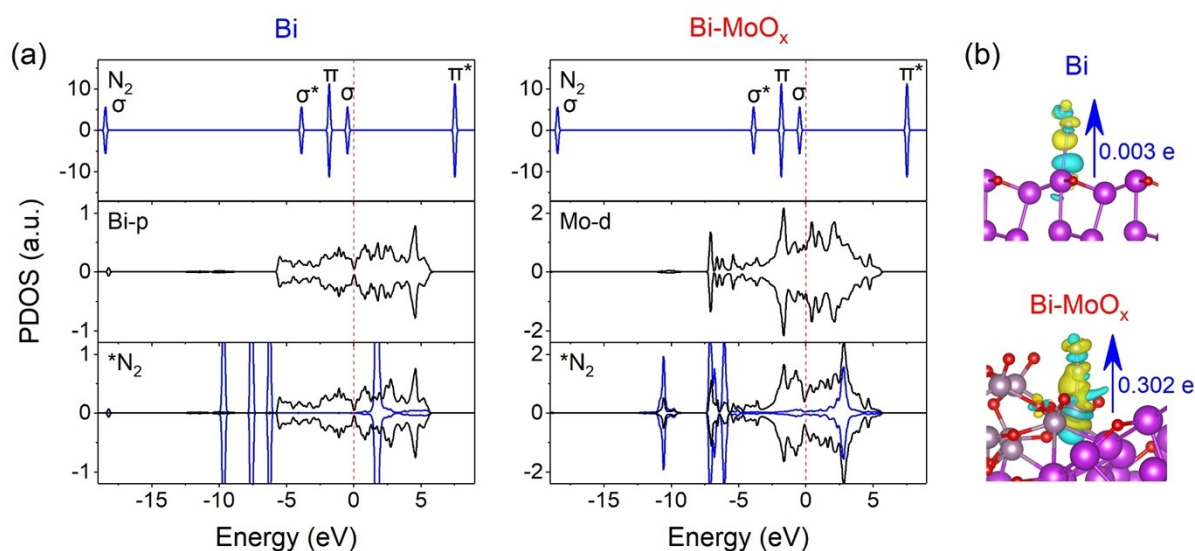

**Fig. S27.** (a) Projected density of states (PDOS) and (b) charge density differences of N<sub>2</sub> adsorbed on Bi and Bi-MoO<sub>x</sub> catalysts. The blue, cyan, red, and gray spheres represent Bi, Mo, O, and N atoms, respectively. The yellow and cyan regions represent electron accumulation and depletion, respectively. The isosurface values of N<sub>2</sub> adsorbed on Bi, and Bi-MoO<sub>x</sub> catalysts are 0.00002 and 0.0005 e/Å<sup>3</sup>, respectively. The Fermi level is set to 0 eV.

**Table S1.** The relative atomic percentage of various functional groups in GO and Bi-MoO<sub>x</sub>@RGO samples.

|                          | O-C=O | C-O   | C-C   |
|--------------------------|-------|-------|-------|
| GO                       | 7.2%  | 43.8% | 49.0% |
| Bi-MoO <sub>x</sub> @RGO | 4.2%  | 16.1% | 79.7% |

**Table S2.** Comparison of electrocatalytic NRR performance of the Bi-MoO<sub>x</sub>@RGO catalyst with recently developed NRR electrocatalysts at ambient conditions.

| Catalyst                                   | NH <sub>3</sub> yield rate                     | Faradaic efficiency (%) | Data source                                         |
|--------------------------------------------|------------------------------------------------|-------------------------|-----------------------------------------------------|
| <b>Bi-MoO<sub>x</sub>@RGO</b>              | <b>19.93 μg h<sup>-1</sup> mg<sup>-1</sup></b> | <b>17.17</b>            | <b>This work</b>                                    |
| 1T'' MoS <sub>2</sub>                      | 9.09 μg h <sup>-1</sup> mg <sup>-1</sup>       | 13.60                   | <sup>1</sup> <i>Adv. Mater.</i> 2021                |
| BiNi alloy                                 | 17.50 μg h <sup>-1</sup> mg <sup>-1</sup>      | 13.80                   | <sup>2</sup> <i>Angew. Chem. Int. Ed.</i> 2021      |
| Bi@C                                       | 4.22 μg h <sup>-1</sup> mg <sup>-1</sup>       | 15.10                   | <sup>3</sup> <i>Adv. Funct. Mater.</i> 2021         |
| MoO <sub>2</sub> @C                        | 9.75 μg h <sup>-1</sup> mg <sup>-1</sup>       | 3.24                    | <sup>4</sup> <i>Inorg. Chem.</i> 2021               |
| Bi <sub>2</sub> Te <sub>3</sub> /C         | 3.90 μg h <sup>-1</sup> cm <sup>-2</sup>       | 7.90                    | <sup>5</sup> <i>Adv. Mater.</i> 2020                |
| Bi nanoparticles                           | 3.25 μg h <sup>-1</sup> cm <sup>-2</sup>       | 12.11                   | <sup>6</sup> <i>Adv. Energy Mater.</i> 2020         |
| Bi nanosheets                              | 12.49 μg h <sup>-1</sup> mg <sup>-1</sup>      | 7.09                    | <sup>7</sup> <i>ACS Sustainable Chem. Eng.</i> 2020 |
| Bi-CeO <sub>2</sub>                        | 6.29 μg h <sup>-1</sup> cm <sup>-2</sup>       | 8.56                    | <sup>8</sup> <i>J. Phys. Chem. C</i> 2020           |
| Bi <sub>5</sub> O <sub>7</sub> I nanotubes | 3.15 μg h <sup>-1</sup> cm <sup>-2</sup>       | 13.42                   | <sup>9</sup> <i>Appl. Catal. B</i> 2020             |

|                                                     |                                           |       |                                                  |
|-----------------------------------------------------|-------------------------------------------|-------|--------------------------------------------------|
| Fe-MoS <sub>2</sub>                                 | 8.63 $\mu\text{g h}^{-1} \text{mg}^{-1}$  | 18.8  | <sup>10</sup> <i>Angew. Chem., Int. Ed.</i> 2020 |
| Mo-Mo <sub>2</sub> C/NCNTs                          | 15.70 $\mu\text{g h}^{-1} \text{cm}^{-2}$ | 7.10  | <sup>11</sup> <i>Adv. Mater.</i> 2020            |
| MoP@rGO                                             | 7.50 $\mu\text{g h}^{-1} \text{mg}^{-1}$  | 9.1   | <sup>12</sup> <i>Dalton Trans.</i> 2020          |
| Defect-rich Bi                                      | 5.45 $\mu\text{g h}^{-1} \text{mg}^{-1}$  | 11.68 | <sup>13</sup> <i>Angew. Chem. Int. Ed.</i> 2019  |
| 2D Bi nanosheet                                     | 2.54 $\mu\text{g h}^{-1} \text{cm}^{-2}$  | 10.46 | <sup>14</sup> <i>ACS Catal.</i> 2019             |
| Co-MoS <sub>2-x</sub>                               | 10.71 $\mu\text{g h}^{-1} \text{mg}^{-1}$ | 10.00 | <sup>15</sup> <i>J. Am. Chem. Soc.</i> 2019      |
| Fe-MoS <sub>2</sub> /CC                             | 12.50 $\mu\text{g h}^{-1} \text{cm}^{-2}$ | 10.80 | <sup>16</sup> <i>J. Mater. Chem. A</i> 2019      |
| MoO <sub>2</sub> -OVs                               | 12.20 $\mu\text{g h}^{-1} \text{mg}^{-1}$ | 8.20  | <sup>17</sup> <i>Nano Energy</i> 2019            |
| BiVO <sub>4</sub>                                   | 8.60 $\mu\text{g h}^{-1} \text{mg}^{-1}$  | 10.04 | <sup>18</sup> <i>Small Methods</i> 2018          |
| Mo <sub>2</sub> C/C                                 | 11.30 $\mu\text{g h}^{-1} \text{mg}^{-1}$ | 7.80  | <sup>19</sup> <i>Adv. Mater.</i> 2018            |
| MoS <sub>2</sub> /CC                                | 4.94 $\mu\text{g h}^{-1} \text{cm}^{-2}$  | 1.17  | <sup>20</sup> <i>Adv. Mater.</i> 2018            |
| Fe/Fe <sub>3</sub> O <sub>4</sub>                   | 0.19 $\mu\text{g h}^{-1} \text{cm}^{-2}$  | 8.29  | <sup>21</sup> <i>ACS Catal.</i> 2018             |
| Ti <sub>3</sub> C <sub>2</sub> T <sub>x</sub> MXene | 0.26 $\mu\text{g h}^{-1} \text{cm}^{-2}$  | 5.78  | <sup>22</sup> <i>Joule</i> 2019                  |

---



## References

- 1 G. Lin, Q. Ju, X. Guo, W. Zhao, S. Adimi, J. Ye, Q. Bi, J. Wang, M. Yang and F. Huang, *Adv. Mater.*, 2021, **33**, e2007509.
- 2 Z. Fang, P. Wu, Y. Qian and G. Yu, *Angew. Chem. Int. Ed.*, 2021, **60**, 4275-4281.
- 3 Y. Wan, H. Zhou, M. Zheng, Z. H. Huang, F. Kang, J. Li and R. Lv, *Adv. Funct. Mater.*, 2021, **31**, 2100300.
- 4 Y. Du, Z. He, F. Ma, Y. Jiang, J. Wan, G. Wu and Y. Liu, *Inorg. Chem.*, 2021, **60**, 4116-4123.
- 5 N. Zhang, F. Zheng, B. Huang, Y. Ji, Q. Shao, Y. Li, X. Xiao and X. Huang, *Adv. Mater.*, 2020, **32**, e1906477.
- 6 D. Yao, C. Tang, L. Li, B. Xia, A. Vasileff, H. Jin, Y. Zhang and S. Z. Qiao, *Adv. Energy Mater.*, 2020, **10**, 2001289.
- 7 L. Xia, W. Fu, P. Zhuang, Y. Cao, M. O. L. Chee, P. Dong, M. Ye and J. Shen, *ACS Sustainable Chem. Eng.*, 2020, **8**, 2735-2741.
- 8 Y. Liu, C. Li, L. Guan, K. Li and Y. Lin, *J. Phys. Chem. C*, 2020, **124**, 18003-18009.
- 9 Y. Liu, B. Huang, X. Chen, Z. Tian, X. Zhang, P. Tsiakaras and P. K. Shen, *Appl. Catal., B*, 2020, **271**, 118919.
- 10 H. Su, L. Chen, Y. Chen, R. Si, Y. Wu, X. Wu, Z. Geng, W. Zhang and J. Zeng, *Angew. Chem. Int. Ed.*, 2020, **59**, 20411-20416.
- 11 Y. Ma, T. Yang, H. Zou, W. Zang, Z. Kou, L. Mao, Y. Feng, L. Shen, S. J. Pennycook, L. Duan, X. Li and J. Wang, *Adv. Mater.*, 2020, **32**, e2002177.
- 12 Y. Zhou, X. Yu, F. Sun and J. Zhang, *Dalton Trans.*, 2020, **49**, 988-992.
- 13 Y. Wang, M. M. Shi, D. Bao, F. L. Meng, Q. Zhang, Y. T. Zhou, K. H. Liu, Y. Zhang, J. Z. Wang, Z. W. Chen, D. P. Liu, Z. Jiang, M. Luo, L. Gu, Q. H. Zhang, X. Z. Cao, Y. Yao, M. H. Shao, Y. Zhang, X. B. Zhang, J. G. Chen, J. M. Yan and Q. Jiang, *Angew. Chem. Int. Ed.*, 2019, **58**, 9464-9469.
- 14 L. Li, C. Tang, B. Xia, H. Jin, Y. Zheng and S.-Z. Qiao, *ACS Catal.*, 2019, **9**, 2902-2908.

- 15 J. Zhang, X. Tian, M. Liu, H. Guo, J. Zhou, Q. Fang, Z. Liu, Q. Wu and J. Lou, *J. Am. Chem. Soc.*, 2019, **141**, 19269-19275.
- 16 X. Zhao, X. Zhang, Z. Xue, W. Chen, Z. Zhou and T. Mu, *J. Mater. Chem. A*, 2019, **7**, 27417-27422.
- 17 G. Zhang, Q. Ji, K. Zhang, Y. Chen, Z. Li, H. Liu, J. Li and J. Qu, *Nano Energy*, 2019, **59**, 10-16.
- 18 J. X. Yao, D. Bao, Q. Zhang, M. M. Shi, Y. Wang, R. Gao, J. M. Yan and Q. Jiang, *Small Methods*, 2018, **3**.
- 19 H. Cheng, L. X. Ding, G. F. Chen, L. Zhang, J. Xue and H. Wang, *Adv. Mater.*, 2018, **30**, e1803694.
- 20 L. Zhang, X. Ji, X. Ren, Y. Ma, X. Shi, Z. Tian, A. M. Asiri, L. Chen, B. Tang and X. Sun, *Adv. Mater.*, 2018, **30**, e1800191.
- 21 L. Hu, A. Khaniya, J. Wang, G. Chen, W. E. Kaden and X. Feng, *ACS Catal.*, 2018, **8**, 9312-9319.
- 22 Y. Luo, G.-F. Chen, L. Ding, X. Chen, L.-X. Ding and H. Wang, *Joule*, 2019, **3**, 279-289.
